# Supplementary material for: Biosynthesis of the Unique Wall Teichoic Acid of Staphylococcus aureus Lineage ST395
Source: PubMed Central journal article supplement — mBio. 2014 Apr 8;5(2):e00869-14. doi: 10.1128/mBio.00869-14 (PMC3993852; doi:10.1128/mbio.00869-14), 2014-04-08
Supplement: mbo002141795sf02.pdf [file mbo002141795sf02.pdf]

|             |       |    |    |    |    |    |    |    |    |     |     |     |     |   |   |   |   |   |   |   |   |   |   |   |   |   |   |   |   |   |   |   |   |   |   |   |   |   |   |   |   |   |   |   |   |   |   |   |   |   |   |   |   |   |   |   |   |   |   |   |   |   |   |   |   |   |   |   |   |   |   |   |   |   |   |   |   |   |   |   |   |   |   |   |   |   |   |   |   |   |   |   |   |   |   |   |   |   |   |   |   |   |   |   |   |   |   |   |   |   |   |   |   |   |   |   |   |   |   |   |   |   |   |   |   |   |   |   |   |
|-------------|-------|----|----|----|----|----|----|----|----|-----|-----|-----|-----|---|---|---|---|---|---|---|---|---|---|---|---|---|---|---|---|---|---|---|---|---|---|---|---|---|---|---|---|---|---|---|---|---|---|---|---|---|---|---|---|---|---|---|---|---|---|---|---|---|---|---|---|---|---|---|---|---|---|---|---|---|---|---|---|---|---|---|---|---|---|---|---|---|---|---|---|---|---|---|---|---|---|---|---|---|---|---|---|---|---|---|---|---|---|---|---|---|---|---|---|---|---|---|---|---|---|---|---|---|---|---|---|---|---|---|---|
|             | 10    | 20 | 30 | 40 | 50 | 60 | 70 | 80 | 90 | 100 | 110 | 120 | 130 |   |   |   |   |   |   |   |   |   |   |   |   |   |   |   |   |   |   |   |   |   |   |   |   |   |   |   |   |   |   |   |   |   |   |   |   |   |   |   |   |   |   |   |   |   |   |   |   |   |   |   |   |   |   |   |   |   |   |   |   |   |   |   |   |   |   |   |   |   |   |   |   |   |   |   |   |   |   |   |   |   |   |   |   |   |   |   |   |   |   |   |   |   |   |   |   |   |   |   |   |   |   |   |   |   |   |   |   |   |   |   |   |   |   |   |   |
|             |       |    |    |    |    |    |    |    |    |     |     |     |     |   |   |   |   |   |   |   |   |   |   |   |   |   |   |   |   |   |   |   |   |   |   |   |   |   |   |   |   |   |   |   |   |   |   |   |   |   |   |   |   |   |   |   |   |   |   |   |   |   |   |   |   |   |   |   |   |   |   |   |   |   |   |   |   |   |   |   |   |   |   |   |   |   |   |   |   |   |   |   |   |   |   |   |   |   |   |   |   |   |   |   |   |   |   |   |   |   |   |   |   |   |   |   |   |   |   |   |   |   |   |   |   |   |   |   |   |
| tag_cluster | M     | K  | R  | V  | I  | T  | Y  | G  | T  | D   | L   | L   | H   | Y | G | H | I | E | L | L | R | R | A | R | E | M | G | D | Y | L | I | V | A | L | S | T | D | E | F | N | Q | I | K | H | K | S | Y | Y | D | Y | E | Q | R | K | M | L | E | S | I | R | Y | V | D | L | V | I | P | E | K | G | W | G | Q | K | E | D | D | V | E | K | F | D | V | D | V | F | V | M | G | H | D | W | E | G | E | F | D | F | L | K | D | K | C | E | V | I | Y | L | K | R | T | E | G | I | S | T | T | K | I | K | Q | E | L | Y | G | K | D | A | K |
| SaGroPI     | ----- | M  | G  | D  | Y  | L  | I  | V  | A  | L   | S   | T   | D   | E | F | N | Q | I | K | N | K | S | Y | Y | D | Y | E | Q | R | K | M | L | E | S | I | R | Y | V | D | L | V | I | P | E | N | N | W | K | Q | N | Q | D | V | T | K | Y | E | V | D | T | F | V | M | G | H | D | W | E | G | E | F | D | F | L | K | N | K | C | E | V | I | Y | L | K | R | T | E | G | I | S | T | T | Q | I | K | Q | E | L | Y | G | K | D | C | K |   |   |   |   |   |   |   |   |   |   |   |   |   |   |   |   |   |   |   |   |   |   |   |   |   |
| Prim.cons.  | M     | K  | R  | V  | I  | T  | Y  | G  | T  | D   | L   | L   | H   | Y | G | H | I | E | L | L | R | R | A | R | E | M | G | D | Y | L | I | V | A | L | S | T | D | E | F | N | Q | I | K | 2 | K | S | Y | Y | D | Y | E | Q | R | K | M | L | E | S | I | R | Y | V | D | L | V | I | P | E | 2 | 2 | W | 2 | Q | K | 2 | 2 | D | V | 2 | K | 2 | 2 | V | D | 2 | F | V | M | G | H | D | W | E | G | E | F | D | F | L | K | 2 | K | C | E | V | I | Y | L | K | R | T | E | G | I | S | T | T | 2 | I | K | Q | E | L | Y | G | K | D | 2 | K |
