# Supplementary material for: Biosynthesis of the Unique Wall Teichoic Acid of Staphylococcus aureus Lineage ST395
Source: PubMed Central journal article supplement — mBio. 2014 Apr 8;5(2):e00869-14. doi: 10.1128/mBio.00869-14 (PMC3993852; doi:10.1128/mbio.00869-14), 2014-04-08
Supplement: mbo002141795sf03.pdf [file mbo002141795sf03.pdf]

10 20 30 40 50 60 70 80 90 100 110 120 130 140 150  
YP\_0026352711 --MNKIGKVLNQASRKYKFI SQPIKGLFKSSYVAKTRRYAKYKHNKIKDNYIVYQSRDGKSMDSPIYAVFLYLLSNKYKHLKHIWVADTKKKKEEFKIKYKHSNVEFVVKESNDFLNLTAKYILNNSFPAYFTKKDNQVYVNT  
EKS314971 --MNVKSGFILNQAKRKYKFI EQPVKSKFKSKYVLTTKTYANFYKKNKVNDRQIVVQARDGKSMDSPIYAVFLYLLSNKYKHLKHIWVADTKKKKEEFKIKYKHSNVEFVVKESDDYLSVLTAKYILNNSFPAYFTKKPEQVYVNT  
TagNxx0 --MKKFRKVIKQLKRAKAFILAPLAKAGFKSKYKSKITKYASIHYNRSVLDITILYQSRDGKSMDSPIYAVFLYLLSNKYKHLKHIWVADTKKKKEEFKIKYKHSNVEFVVKESDDYLSVLTAKYILNNSFPAYFTKKPEQVYVNT  
EEK119891 -----SLIQPRYRKYKHIWVADTKKKKEEFKIKYKHSNVEFVVKESDDYLSVLTAKYILNNSFPAYFTKKPEQVYVNT  
YP\_0057595521 ---MALKKFIINQIQKRFKFI STPLKNKKKSAYTSKVMYAKYDRLKVKNNLILYQVDRGKSMDSPIYAVFLYLLSNKYKHLKHIWVADTKKKKEEFKIKYKHSNVEFVVKESDDYLSVLTAKYILNNSFPAYFTKKVDQVYVNT  
EES417411 --MKNFKNFANQSRKINFI STSPINMMNKSNNYHQVMTYAKYDGLKVKDQILYQVDRGKSMDSPIYAVFLYLLSNKYKHLKHIWVADTKKKKEEFKIKYKHSNVEFVVKESDDYLSVLTAKYILNNSFPAYFTKKENQVYVNT  
EEQ796841 --MRKATQSLIKNQFKRRTSFLTKPIKTFNKSPYFKKVMYAHYKKNVNPESHILYQVDRGKSMDSPIYAVFLYLLSNKYKHLKHIWVADTKKKKEEFKIKYKHSNVEFVVKESDDYLSVLTAKYILNNSFPAYFTKKENQVYVNT  
YP\_0060144671 MMKKSIRKILSNQLSRKYKFIASPIKRAKSKYKQKVNQYALYHSTSIKPHQILYQVDRGKSMDSPIYAVFLYLLSNKYKHLKHIWVADTKKKKEEFKIKYKHSNVEFVVKESDDYLSVLTAKYILNNSFPAYFTKKPEQVYVNT  
YP\_0055629171 -----MKNKLVKRRRAKFLLEPFKTYTNKNKFKRTVEYTRNFKKNKIDPHIIFYESYHGKAMNDNPIYAFKHLVNNNEEYKNTFHVWALNDQD--NPYANKYKGLKNVRFVKVHSEYIKYLTAKYILNNSFPAYFTKKPEQVYVNT  
EOP630901 ---MQIKKKINRMKNRINFLSGPLKKSNDQGFKRTVRYTDFYVVKLDLDEKVIYLSFHHGKMTDSPIYAVFKKIIDNPEYKDYTHVWALNDQD--NFYAKRYENKKNVRFVKVHSEYIKYLTAKYILNNSFPAYFTKKPEQVYVNT

Prim.cons. MMMKK2KKFILNQ2KRYKFI S2PIK22FKSKYFKK22TYAKYKKNKVKDQILYQ2RDGKSMDSPIYAVFLYLLSNKYKHLKHIWVADTKKKKEEFKIKYKHSNVEFVVKESDDYLSVLTAKYILNNSFPAYFTKK3EQVYVNT

160 170 180 190 200 210 220 230 240 250 260 270 280 290 300  
YP\_0026352711 WHGTPKAMGLDVEDNLIGSQNI IKNFLSSDILLSPNPHTSKIFKRAFSLDGLYNGNLEIGYPRIDLTINANKNVFKHLKQSGIRVSNREIILFAPTWRGNNVKNPESLDRDVMVMELEKNN--DYQVLVQVHFFVYKTKALKYKEL  
EKS314971 WHGTPKAMGLDVEDNLIGSQNI IKNFLSADILVSPNPHTEVFKRAFSLDGLYNGNLEIGYPRIDLTINANKNVFKHLKQSGIRVSNREIILFAPTWRGNNVKNPESLDRDVMVMELEKNN--DYQVLVQVHFFVYKTKALKYKEL  
TagNxx0 WHGTPKAMGLDVEDNLIGSQNI IKNFLSSDILLSPNPHTSKIFKRAFSLDGLYNGNLEIGYPRIDLTINANKNVFKHLKQSGIRVSNREIILFAPTWRGNNVKNPESLDRDVMVMELEKNN--DYQVLVQVHFFVYKTKALKYKEL  
EEK119891 WHGTPKAMGLDVEDNLIGSQNI IKNFLSSDILLSPNPHTSKIFKRAFSLDGLYNGNLEIGYPRIDLTINANKNVFKHLKQSGIRVSNREIILFAPTWRGNNVKNPESLDRDVMVMELEKNN--DYQVLVQVHFFVYKTKALKYKEL  
YP\_0057595521 WHGTPKAMGLDVEDNLIGSQNI IKNFLSSDILLSPNPHTSKIFKRAFSLDGLYNGNLEIGYPRIDLTINANKNVFKHLKQSGIRVSNREIILFAPTWRGNNVKNPESLDRDVMVMELEKNN--DYQVLVQVHFFVYKTKALKYKEL  
EES417411 WHGTPKAMGLDVEDNLIGSQNI IKNFLSSDILLSPNPHTSKIFKRAFSLDGLYNGNLEIGYPRIDLTINANKNVFKHLKQSGIRVSNREIILFAPTWRGNNVKNPESLDRDVMVMELEKNN--DYQVLVQVHFFVYKTKALKYKEL  
EEQ796841 WHGTPKAMGLDVEDNLIGSQNI IKNFLSSDILLSPNPHTSKIFKRAFSLDGLYNGNLEIGYPRIDLTINANKNVFKHLKQSGIRVSNREIILFAPTWRGNNVKNPESLDRDVMVMELEKNN--DYQVLVQVHFFVYKTKALKYKEL  
YP\_0060144671 WHGTPKAMGLDVEDNLIGSQNI IKNFLSSDILLSPNPHTSKIFKRAFSLDGLYNGNLEIGYPRIDLTINANKNVFKHLKQSGIRVSNREIILFAPTWRGNNVKNPESLDRDVMVMELEKNN--DYQVLVQVHFFVYKTKALKYKEL  
YP\_0055629171 WHGTPKAMGLDVEDNLIGSQNI IKNFLSSDILLSPNPHTSKIFKRAFSLDGLYNGNLEIGYPRIDLTINANKNVFKHLKQSGIRVSNREIILFAPTWRGNNVKNPESLDRDVMVMELEKNN--DYQVLVQVHFFVYKTKALKYKEL  
EOP630901 WHGTPKAMGLDVEDNLIGSQNI IKNFLSSDILLSPNPHTSKIFKRAFSLDGLYNGNLEIGYPRIDLTINANKNVFKHLKQSGIRVSNREIILFAPTWRGNNVKNPESLDRDVMVMELEKNN--DYQVLVQVHFFVYKTKALKYKEL

Prim.cons. WHGTPKAMGLDVEDNLIGSQNI IKNFLSSDILLSPNPHTSKIFKRAFSLDGLYNGNLEIGYPRIDLTINANKNVFKHLKQSGIRVSNREIILFAPTWRGNNVKNPESLDRDVMVMELEKNN--DYQVLVQVHFFVYKTKALKYKEL

310 320 330 340 350 360 370 380 390 400 410 420 430 440 450  
YP\_0026352711 KPYLIPDSFDTNELLVSVDDLITDYSSIFFDFLVDKPIIFYPDYDEYKNDRGFYIKPDPVLPGPSVFDTEENLVDVAVNKAASKYERQYQEFKNLYVVPYENKGVTEKLIIDTMFSSKKGK--SLK----TKETILYIPGGMKNNGITT  
EKS314971 KPYLIPDSFDTNELLVSVDDLITDYSSIFFDFLVDKPIIFYPDYDEYKNDRGFYIKPDPVLPGPSVFDTEENLVDVAVNKAASKYERQYQEFKNLYVVPYENKGVTEKLIIDTMFSSKKGK--SLK----TKETILYIPGGMKNNGITT  
TagNxx0 KPYLIPDSFDTNELLVSVDDLITDYSSIFFDFLVDKPIIFYPDYDEYKNDRGFYIKPDPVLPGPSVFDTEENLVDVAVNKAASKYERQYQEFKNLYVVPYENKGVTEKLIIDTMFSSKKGK--SLK----TKETILYIPGGMKNNGITT  
EEK119891 KPYLIPDSFDTNELLVSVDDLITDYSSIFFDFLVDKPIIFYPDYDEYKNDRGFYIKPDPVLPGPSVFDTEENLVDVAVNKAASKYERQYQEFKNLYVVPYENKGVTEKLIIDTMFSSKKGK--SLK----TKETILYIPGGMKNNGITT  
YP\_0057595521 LPYLIPDYFDTNELLVSVDDLITDYSSIFFDFLVDKPIIFYPDYDEYKNDRGFYIKPDPVLPGPSVFDTEENLVDVAVNKAASKYERQYQEFKNLYVVPYENKGVTEKLIIDTMFSSKKGK--SLK----TKETILYIPGGMKNNGITT  
EES417411 KPYLIPDYFDTNELLVSVDDLITDYSSIFFDFLVDKPIIFYPDYDEYKNDRGFYIKPDPVLPGPSVFDTEENLVDVAVNKAASKYERQYQEFKNLYVVPYENKGVTEKLIIDTMFSSKKGK--SLK----TKETILYIPGGMKNNGITT  
EEQ796841 KPYLIPDYFDTNELLVSVDDLITDYSSIFFDFLVDKPIIFYPDYDEYKNDRGFYIKPDPVLPGPSVFDTEENLVDVAVNKAASKYERQYQEFKNLYVVPYENKGVTEKLIIDTMFSSKKGK--SLK----TKETILYIPGGMKNNGITT  
YP\_0060144671 KPYLIPDYFDTNELLVSVDDLITDYSSIFFDFLVDKPIIFYPDYDEYKNDRGFYIKPDPVLPGPSVFDTEENLVDVAVNKAASKYERQYQEFKNLYVVPYENKGVTEKLIIDTMFSSKKGK--SLK----TKETILYIPGGMKNNGITT  
YP\_0055629171 MNKCIIDCITNELLVSVDDLITDYSSIFFDFLVDKPIIFYPDYDEYKNDRGFYIKPDPVLPGPSVFDTEENLVDVAVNKAASKYERQYQEFKNLYVVPYENKGVTEKLIIDTMFSSKKGK--SLK----TKETILYIPGGMKNNGITT  
EOP630901 REICIPDWVDPNELMSIVDVLVTDYSSIFFDFLVDKPIIFYPDYDEYKNDRGFYIKPDPVLPGPSVFDTEENLVDVAVNKAASKYERQYQEFKNLYVVPYENKGVTEKLIIDTMFSSKKGK--SLK----TKETILYIPGGMKNNGITT

Prim.cons. KPYLIPDYFDTNELLVSVDDLITDYSSIFFDFLVDKPIIFYPDYDEYKNDRGFYIKPDPVLPGPSVFDTEENLVDVAVNKAASKYERQYQEFKNLYVVPYENKGVTEKLIIDTMFSSKKGK--SLK----TKETILYIPGGMKNNGITT

460 470 480 490 500 510 520 530 540 550 560 570 580 590 600  
YP\_0026352711 SAINLLENIDYEKYDVTIFLNNTNKEILNLLN2VNEVRIILR3GPLLASLKE3YRV4FV2QRGLKS2LEK22YPKE2YERFRKIFGDSQFDYIDFSGYSMFW2NLLATEAKRKLILYHSDIKADMNRTVNGRPHYQNLKGVISL  
EKS314971 SAINLLENIDYEKYDVTIFLNNTNKEILNLLN2VNEVRIILR3GPLLASLKE3YRV4FV2QRGLKS2LEK22YPKE2YERFRKIFGDSQFDYIDFSGYSMFW2NLLATEAKRKLILYHSDIKADMNRTVNGRPHYQNLKGVISL  
TagNxx0 SAINLLENIDYEKYDVTIFLNNTNKEILNLLN2VNEVRIILR3GPLLASLKE3YRV4FV2QRGLKS2LEK22YPKE2YERFRKIFGDSQFDYIDFSGYSMFW2NLLATEAKRKLILYHSDIKADMNRTVNGRPHYQNLKGVISL  
EEK119891 SAINLLENIDYEKYDVTIFLNNTNKEILNLLN2VNEVRIILR3GPLLASLKE3YRV4FV2QRGLKS2LEK22YPKE2YERFRKIFGDSQFDYIDFSGYSMFW2NLLATEAKRKLILYHSDIKADMNRTVNGRPHYQNLKGVISL  
YP\_0057595521 SAINLLENIDYEKYDVTIFLNNTNKEILNLLN2VNEVRIILR3GPLLASLKE3YRV4FV2QRGLKS2LEK22YPKE2YERFRKIFGDSQFDYIDFSGYSMFW2NLLATEAKRKLILYHSDIKADMNRTVNGRPHYQNLKGVISL  
EES417411 SAINLLENIDYEKYDVTIFLNNTNKEILNLLN2VNEVRIILR3GPLLASLKE3YRV4FV2QRGLKS2LEK22YPKE2YERFRKIFGDSQFDYIDFSGYSMFW2NLLATEAKRKLILYHSDIKADMNRTVNGRPHYQNLKGVISL  
EEQ796841 SAINLLENIDYEKYDVTIFLNNTNKEILNLLN2VNEVRIILR3GPLLASLKE3YRV4FV2QRGLKS2LEK22YPKE2YERFRKIFGDSQFDYIDFSGYSMFW2NLLATEAKRKLILYHSDIKADMNRTVNGRPHYQNLKGVISL  
YP\_0060144671 SAINLLENIDYEKYDVTIFLNNTNKEILNLLN2VNEVRIILR3GPLLASLKE3YRV4FV2QRGLKS2LEK22YPKE2YERFRKIFGDSQFDYIDFSGYSMFW2NLLATEAKRKLILYHSDIKADMNRTVNGRPHYQNLKGVISL  
YP\_0055629171 SAINLLENIDYEKYDVTIFLNNTNKEILNLLN2VNEVRIILR3GPLLASLKE3YRV4FV2QRGLKS2LEK22YPKE2YERFRKIFGDSQFDYIDFSGYSMFW2NLLATEAKRKLILYHSDIKADMNRTVNGRPHYQNLKGVISL  
EOP630901 SAINLLENIDYEKYDVTIFLNNTNKEILNLLN2VNEVRIILR3GPLLASLKE3YRV4FV2QRGLKS2LEK22YPKE2YERFRKIFGDSQFDYIDFSGYSMFW2NLLATEAKRKLILYHSDIKADMNRTVNGRPHYQNLKGVISL

Prim.cons. SAINLLENIDYEKYDVTIFLNNTNKEILNLLN2VNEVRIILR3GPLLASLKE3YRV4FV2QRGLKS2LEK22YPKE2YERFRKIFGDSQFDYIDFSGYSMFW2NLLATEAKRKLILYHSDIKADMNRTVNGRPHYQNLKGVISL

610 620 630 640 650 660 670 680 690 700 710 720 730 740 750  
YP\_0026352711 YYKFDYLVSVSEETCKININNLATPSTKPKFVSAMNTINLPKINKLLNEDT--DFFIHKGN--QVLAIQKNE----IVSVFPNE--DDYKVMAMGRSPEKGFIDLINGFKGIVKTSPT--AKLYILGEGLLRKALEDMIKRLKLEDNVFLV  
EKS314971 YYKFDYLVSVSEETCKININNLATPSTKPKFVSAMNTINLPKINKLLNEDT--DFFIHKGN--QVLAIQKNE----IVSVFPNE--DDYKVMAMGRSPEKGFIDLINGFKGIVKTSPT--AKLYILGEGLLRKALEDMIKRLKLEDNVFLV  
TagNxx0 YYKFDYLVSVSEETCKININNLATPSTKPKFVSAMNTINLPKINKLLNEDT--DFFIHKGN--QVLAIQKNE----IVSVFPNE--DDYKVMAMGRSPEKGFIDLINGFKGIVKTSPT--AKLYILGEGLLRKALEDMIKRLKLEDNVFLV  
EEK119891 YYKFDYLVSVSEETCKININNLATPSTKPKFVSAMNTINLPKINKLLNEDT--DFFIHKGN--QVLAIQKNE----IVSVFPNE--DDYKVMAMGRSPEKGFIDLINGFKGIVKTSPT--AKLYILGEGLLRKALEDMIKRLKLEDNVFLV  
YP\_0057595521 YQYFDKLVSVSEATKKNQKQKIKDKSLNKKFVTSRNTINLNKINQLKDDSD--EKFEKQHQ--SVLVRINNRD----ISSVFPKE--DDFKIVTAGRSLPEKGFIDLINGFKGIVKTSPT--AKLYILGEGLLRKALEDMIKRLKLEDNVFLV  
EES417411 YQYFDKLVSVSEATKKNQKQKIKDKSLNKKFVTSRNTINLNKINQLKDDSD--EKFEKQHQ--SVLVRINNRD----ISSVFPKE--DDFKIVTAGRSLPEKGFIDLINGFKGIVKTSPT--AKLYILGEGLLRKALEDMIKRLKLEDNVFLV  
EEQ796841 YQYFDKLVSVSEATKKNQKQKIKDKSLNKKFVTSRNTINLNKINQLKDDSD--EKFEKQHQ--SVLVRINNRD----ISSVFPKE--DDFKIVTAGRSLPEKGFIDLINGFKGIVKTSPT--AKLYILGEGLLRKALEDMIKRLKLEDNVFLV  
YP\_0060144671 YQYFDKLVSVSEATKKNQKQKIKDKSLNKKFVTSRNTINLNKINQLKDDSD--EKFEKQHQ--SVLVRINNRD----ISSVFPKE--DDFKIVTAGRSLPEKGFIDLINGFKGIVKTSPT--AKLYILGEGLLRKALEDMIKRLKLEDNVFLV  
YP\_0055629171 YQYFDKLVSVSEATKKNQKQKIKDKSLNKKFVTSRNTINLNKINQLKDDSD--EKFEKQHQ--SVLVRINNRD----ISSVFPKE--DDFKIVTAGRSLPEKGFIDLINGFKGIVKTSPT--AKLYILGEGLLRKALEDMIKRLKLEDNVFLV  
EOP630901 YQYFDKLVSVSEATKKNQKQKIKDKSLNKKFVTSRNTINLNKINQLKDDSD--EKFEKQHQ--SVLVRINNRD----ISSVFPKE--DDFKIVTAGRSLPEKGFIDLINGFKGIVKTSPT--AKLYILGEGLLRKALEDMIKRLKLEDNVFLV

Prim.cons. YQYFDKLVSVSEATKKNQKQKIKDKSLNKKFVTSRNTINLNKINQLKDDSD--EKFEKQHQ--SVLVRINNRD----ISSVFPKE--DDFKIVTAGRSLPEKGFIDLINGFKGIVKTSPT--AKLYILGEGLLRKALEDMIKRLKLEDNVFLV

760 770 780 790 800 810 820 830 840 850 860 870  
YP\_0026352711 GQKGNPFNIMKRCDFALTSHEYEGQSMVLEALITGNTLASDI PANRYVLRKFGDYGMLSENTPDLEEIRKFMNHTTPT-----FEHFDANKHNTALDQLYSLN-----  
EKS314971 GQKGNPFNIMKRCDFALTSHEYEGQSMVLEALITGNTLASDI PANRYVLRKFGDYGMLSENTPDLEEIRKFMNHTTPT-----FEHFDANKHNTALDQLYSLN-----  
TagNxx0 GQKGNPFNIMKRCDFALTSHEYEGQSMVLEALITGNTLASDI PANRYVLRKFGDYGMLSENTPDLEEIRKFMNHTTPT-----FEHFDANKHNTALDQLYSLN-----  
EEK119891 GQKGNPFNIMKRCDFALTSHEYEGQSMVLEALITGNTLASDI PANRYVLRKFGDYGMLSENTPDLEEIRKFMNHTTPT-----FEHFDANKHNTALDQLYSLN-----  
YP\_0057595521 GQKGNPFNIMKRCDFALTSHEYEGQSMVLEALITGNTLASDI PANRYVLRKFGDYGMLSENTPDLEEIRKFMNHTTPT-----FEHFDANKHNTALDQLYSLN-----  
EES417411 GQKGNPFNIMKRCDFALTSHEYEGQSMVLEALITGNTLASDI PANRYVLRKFGDYGMLSENTPDLEEIRKFMNHTTPT-----FEHFDANKHNTALDQLYSLN-----  
EEQ796841 GQKGNPFNIMKRCDFALTSHEYEGQSMVLEALITGNTLASDI PANRYVLRKFGDYGMLSENTPDLEEIRKFMNHTTPT-----FEHFDANKHNTALDQLYSLN-----  
YP\_0060144671 GQKGNPFNIMKRCDFALTSHEYEGQSMVLEALITGNTLASDI PANRYVLRKFGDYGMLSENTPDLEEIRKFMNHTTPT-----FEHFDANKHNTALDQLYSLN-----  
YP\_0055629171 GQKGNPFNIMKRCDFALTSHEYEGQSMVLEALITGNTLASDI PANRYVLRKFGDYGMLSENTPDLEEIRKFMNHTTPT-----FEHFDANKHNTALDQLYSLN-----  
EOP630901 GQKGNPFNIMKRCDFALTSHEYEGQSMVLEALITGNTLASDI PANRYVLRKFGDYGMLSENTPDLEEIRKFMNHTTPT-----FEHFDANKHNTALDQLYSLN-----

Prim.cons. GQKGNPFNIMKRCDFALTSHEYEGQSMVLEALITGNTLASDI PANRYVLRKFGDYGMLSENTPDLEEIRKFMNHTTPT-----FEHFDANKHNTALDQLYSLN-----
