# Supplementary figures and images for: Biosynthesis of the Unique Wall Teichoic Acid of Staphylococcus aureus Lineage ST395
Source: PubMed Central journal article supplement — mBio. 2014 Apr 8;5(2):e00869-14. doi: 10.1128/mBio.00869-14 (PMC3993852; doi:10.1128/mbio.00869-14), 2014-04-08

**A**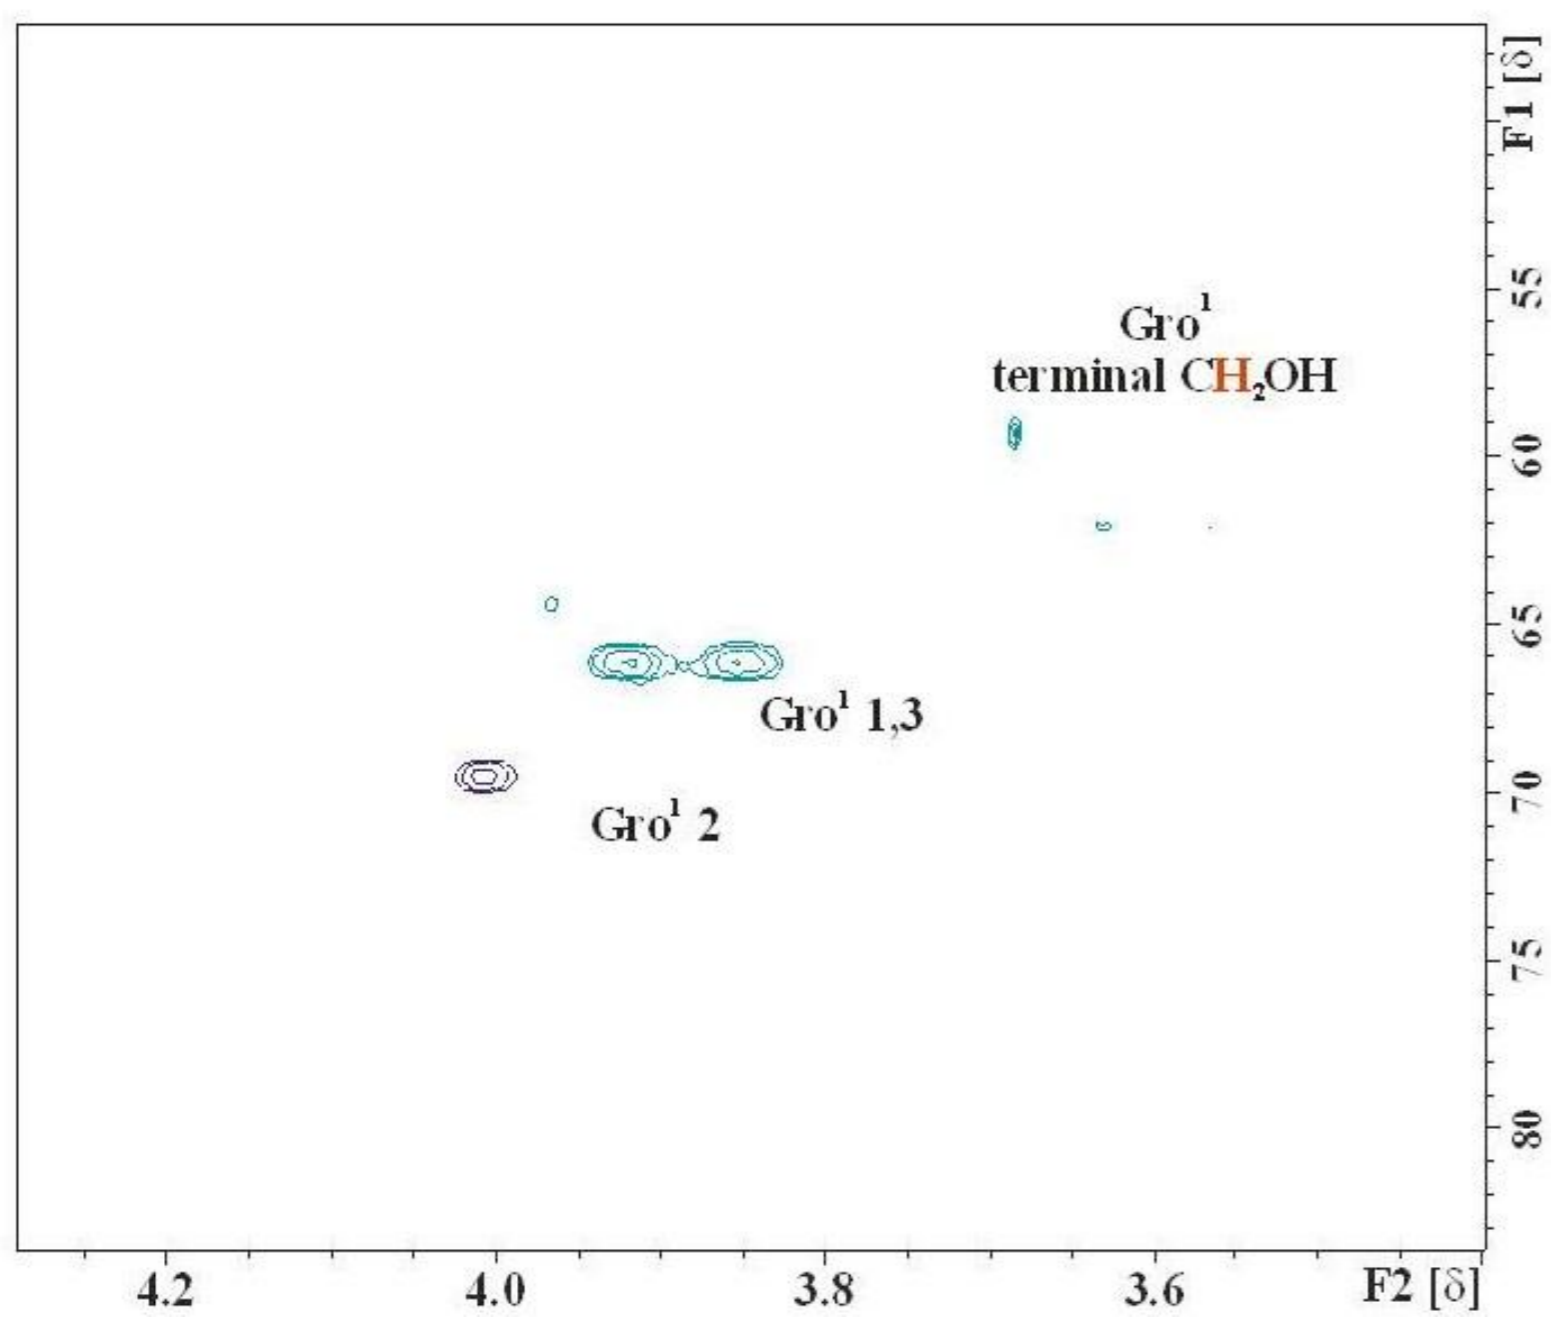**B**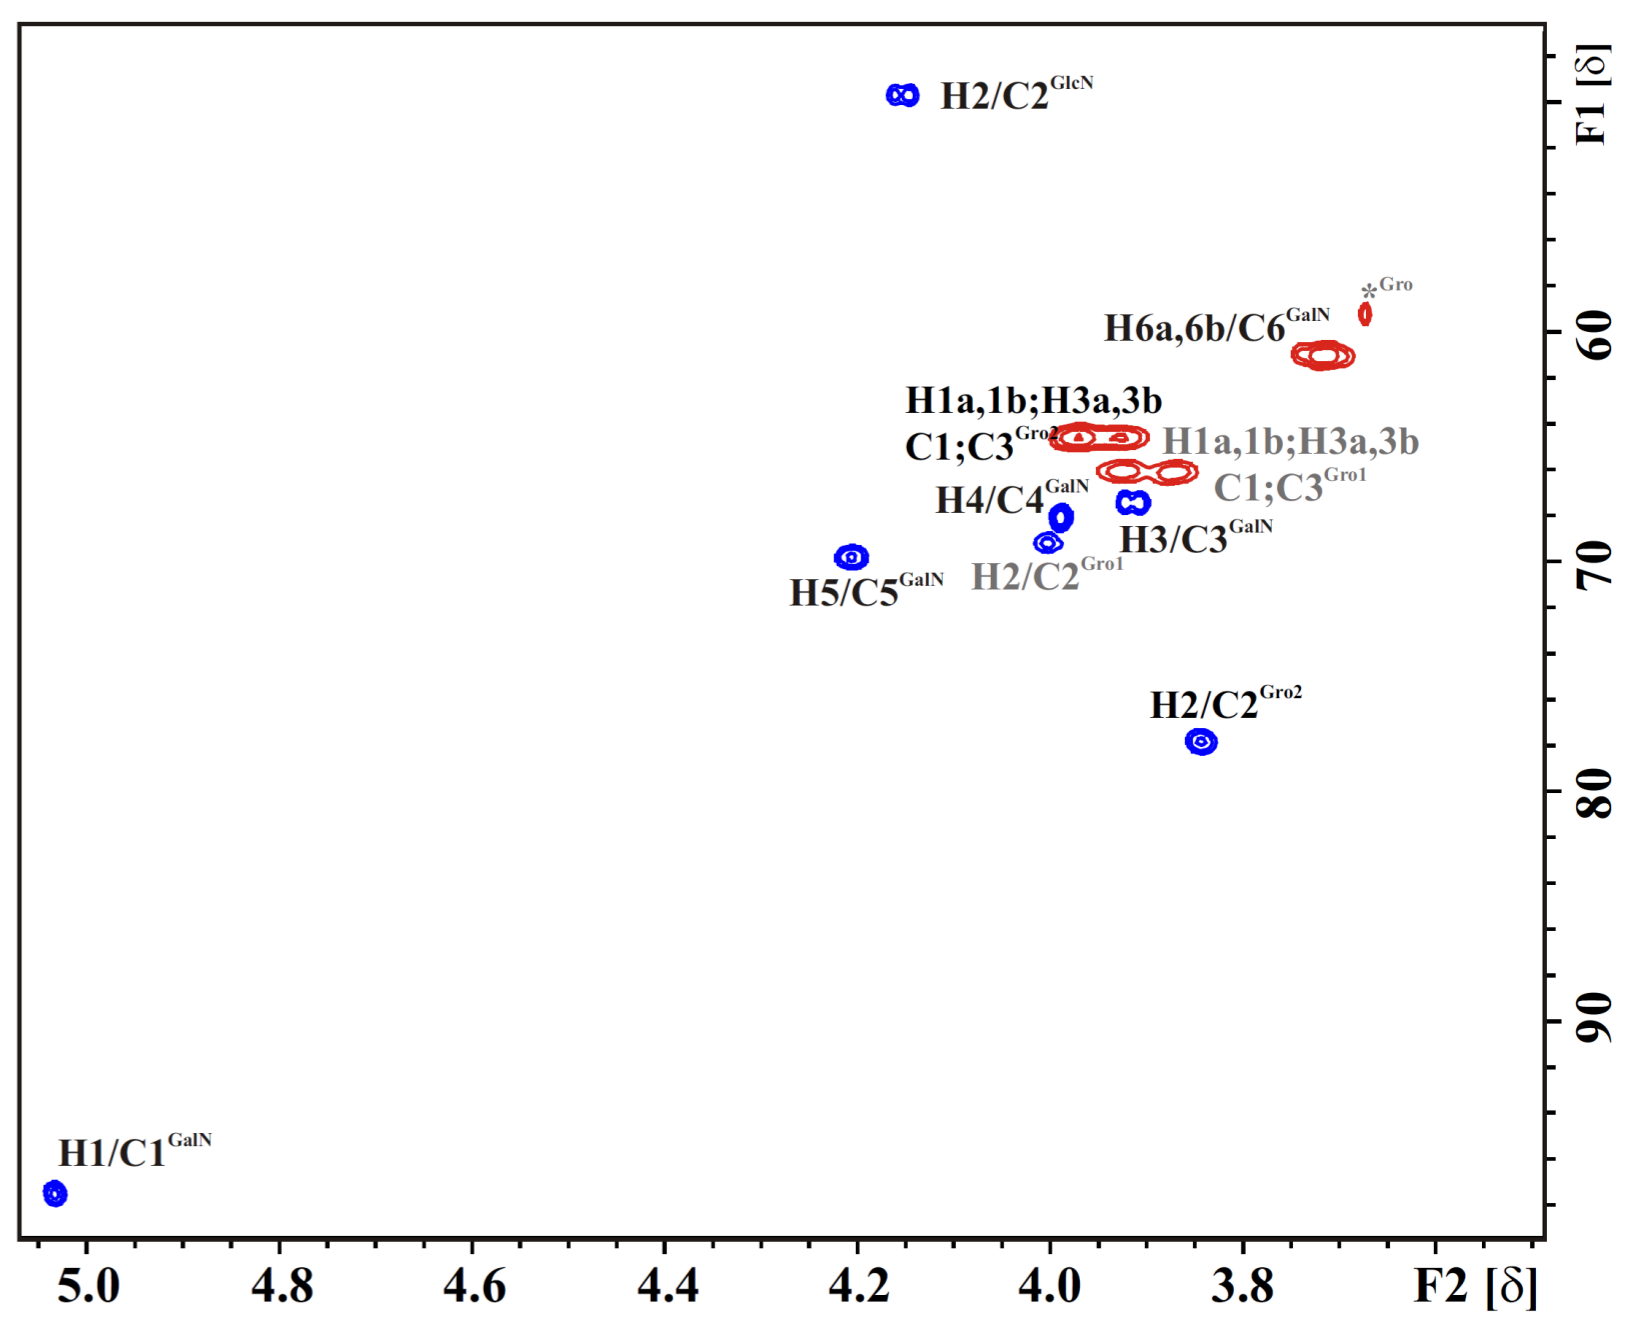

Supplement: mbo002141795sf04.pdf [file mbo002141795sf04.pdf]

**A**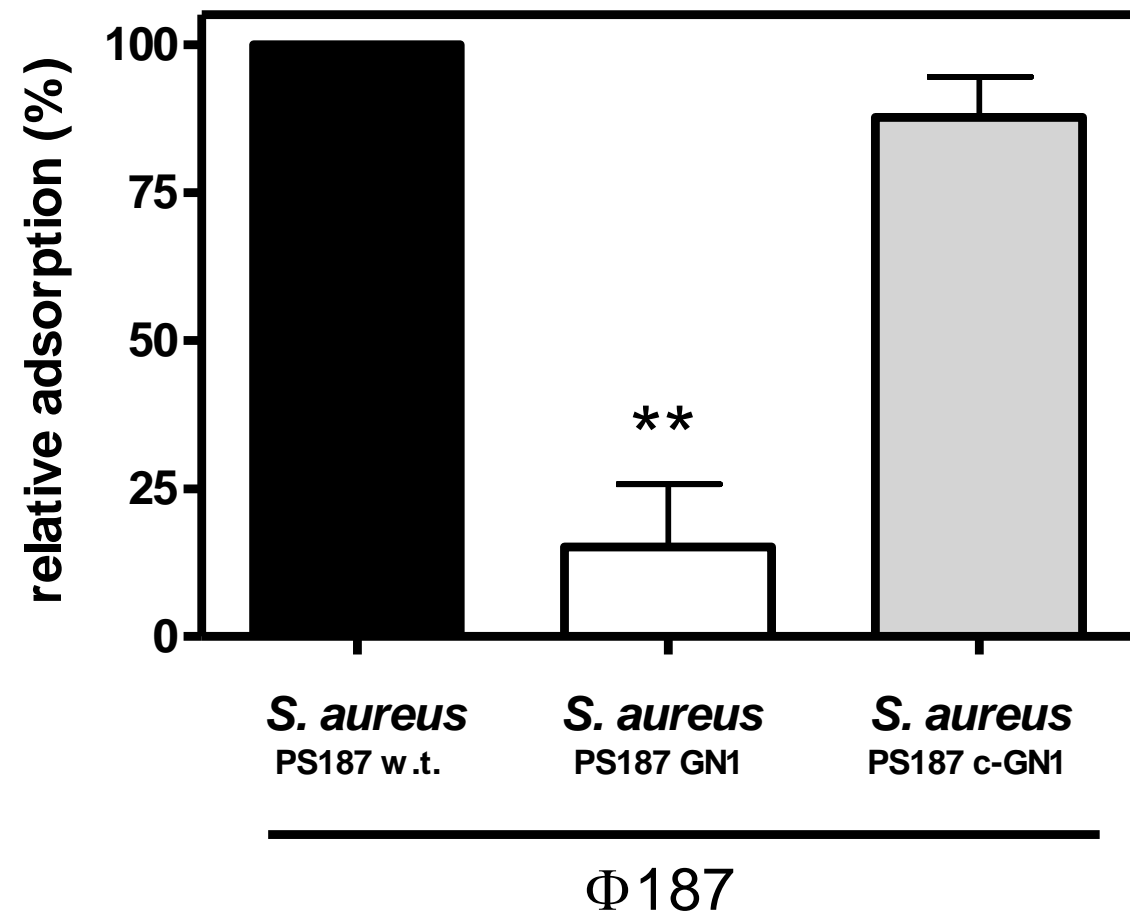**B**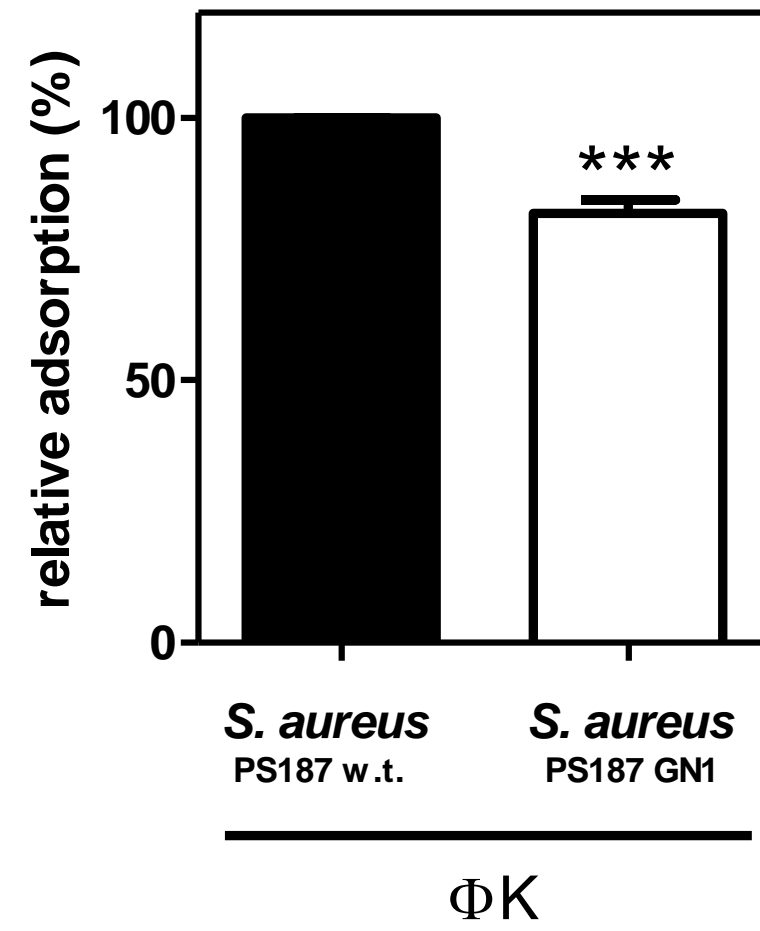**C**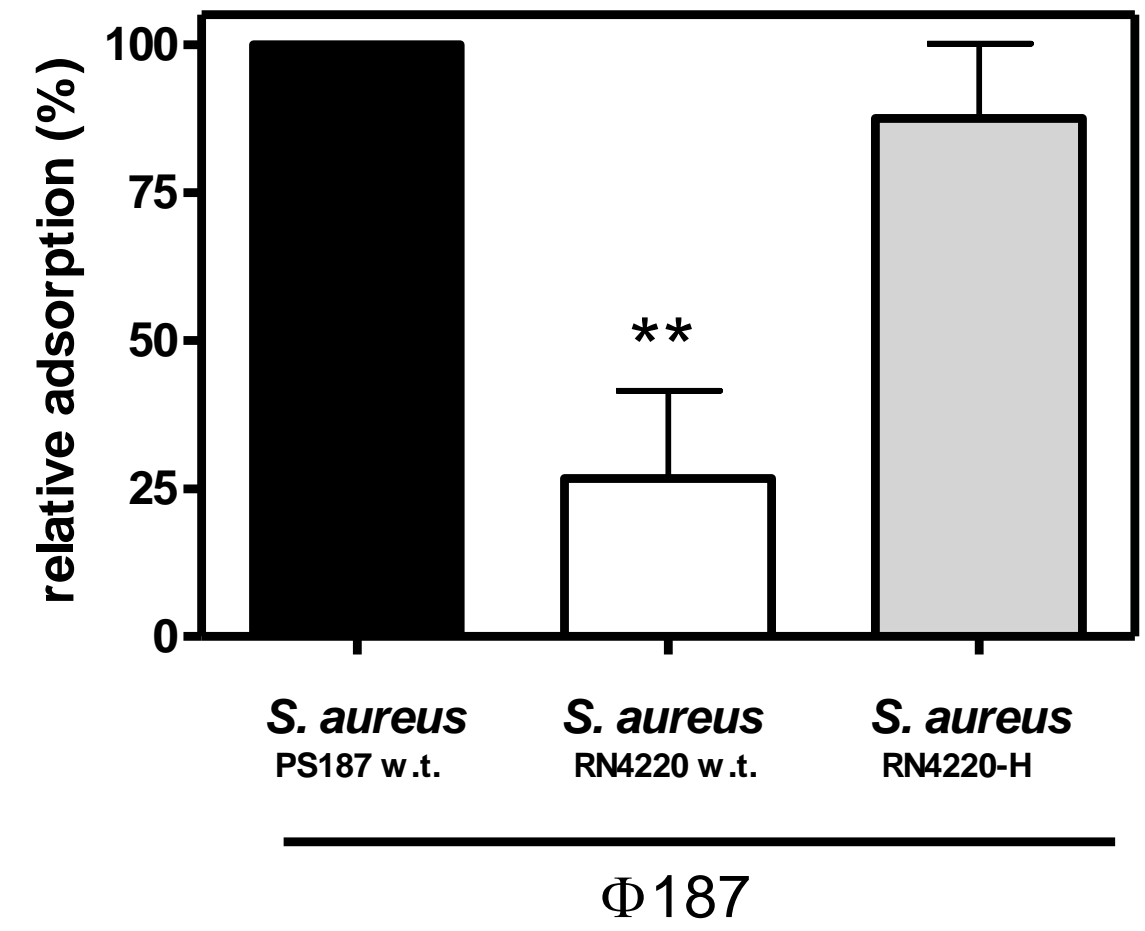**D**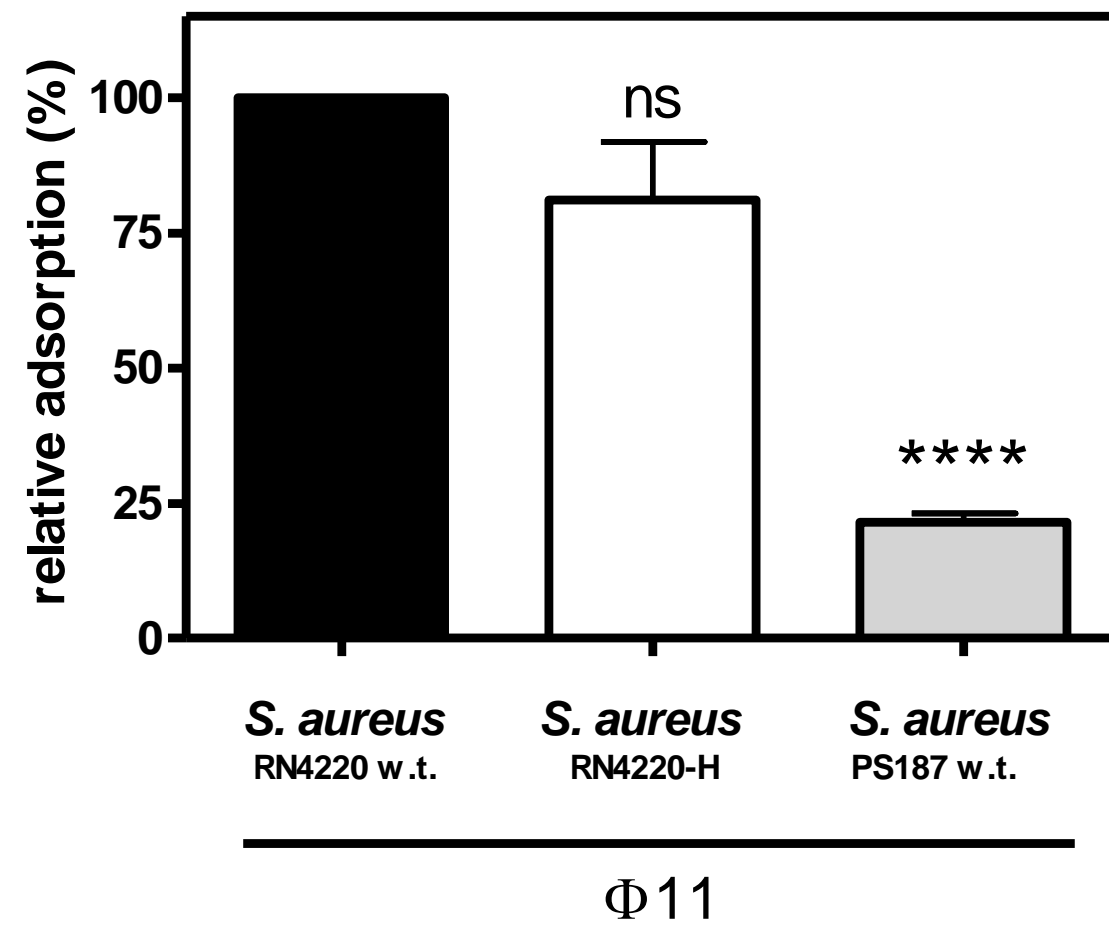**E**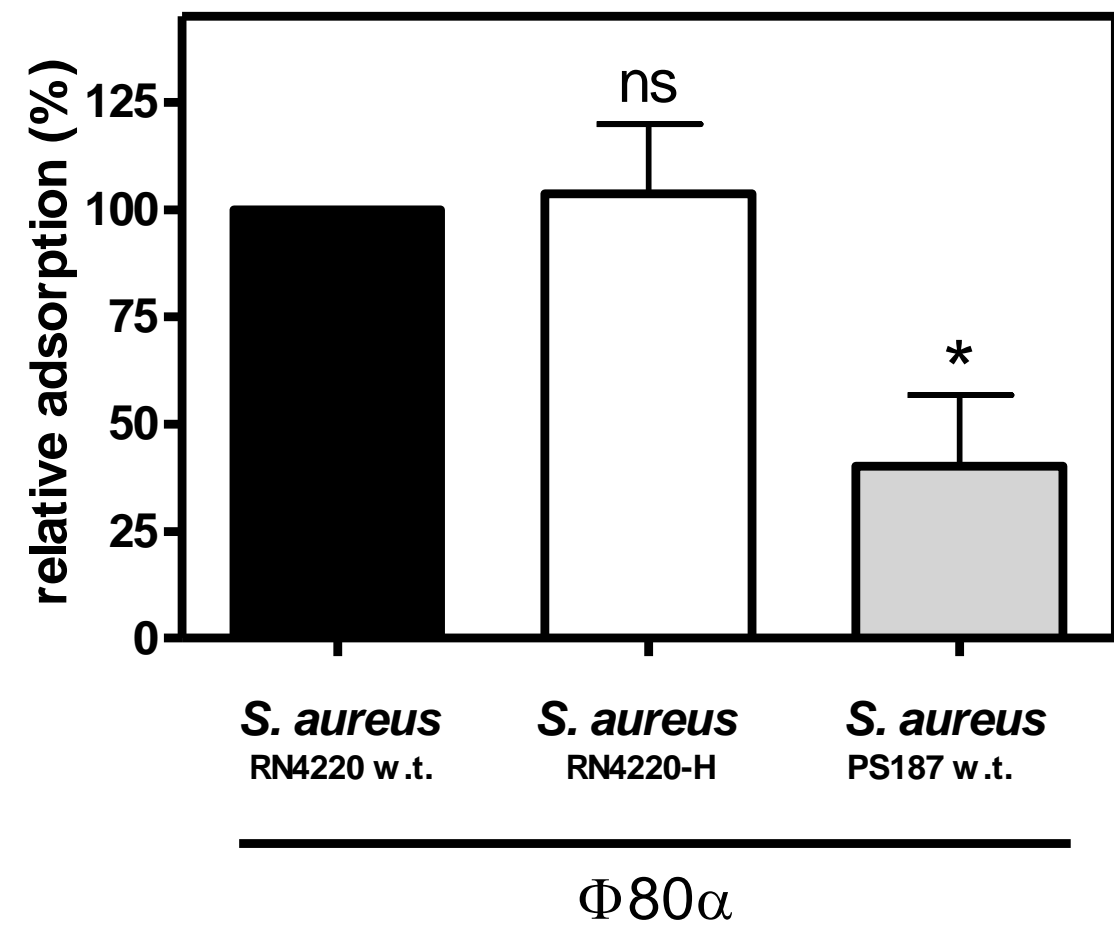

Supplement: mbo002141795sf05.pdf [file mbo002141795sf05.pdf]
